# Supplementary material for: Delineating the calling pattern of Oecanthus indicus from native and non-native plant species
Source: PeerJ. 2023 Oct 18;11:e16153. doi: 10.7717/peerj.16153 (PMC10590098; doi:10.7717/peerj.16153)
Supplement: Supplemental Information 4 [file peerj-11-16153-s004.xlsx]

## Sheet: Sheet 1
			Regressed Peak Frequency (kHz) wrt Temp								Regressed SyllablePeriod(s) wrt Temp								Regressed SyllableDuratio(s) wrt Temp								Regressed Echeme period wrt Temp							Regressed Echemeduration wrt Temp
	L. camara	Recording Locations	File name	PeakFre	Recorded Temp(C)	Regression value		Slope	Regressed value		File name	SP(s)	Recorded Temp(C)	regression value		Slope	Regressed value		File name	SD	Recorded Temp(C)	Regression value		Slope	Regressed value		File name	EP	Recorded Temp(C)	Regression value	Slope	Regressed Value		File name		ED	Recorded Temp(C)	Regression value	Slope	Regressed Value
	H. suaveolens	DDN	FC131027_0076	2.088	22	22		0.0430187	2.088		FC131027_0076	0.0229801	22	22		-0.00167381	0.0229801		FC131027_0076	0.017745	22	22		-0.000466817	0.017745		FC131027_0076	1.0149	22	22	-0.0409818	1.0149		FC131027_0076		0.607558	22	22	-0.0143452	0.607558
	J. adhatoda	DDN	FC131027_0078	2.172	22	22		0.0430187	2.172		FC131027_0078	0.044432	22	22		-0.00167381	0.044432		FC131027_0078	0.0231065	22	22		-0.000466817	0.0231065		FC131027_0078	1.02278	22	22	-0.0409818	1.02278		FC131027_0078		0.457098	22	22	-0.0143452	0.457098
		DLI	FC161013FILE2	2.591	25.6	22		0.0430187	2.43613		FC161013FILE2	0.0231036	25.6	22		-0.00167381	0.0291293		FC161013FILE2	0.0146574	25.6	22		-0.000466817	0.0163379		FC161013FILE2	0.646247	25.6	22	-0.0409818	0.793782		FC161013FILE2		0.521265	25.6	22	-0.0143452	0.572908
DDN	Dehradun	DLI	FC171013 FILE1	2.659	24	22		0.0430187	2.57296		FC171013 FILE1	0.0192231	24	22		-0.00167381	0.0225707		FC171013 FILE1	0.0123665	24	22		-0.000466817	0.0133002		FC171013 FILE1	0.593444	24	22	-0.0409818	0.675408		FC171013 FILE1		0.4531	24	22	-0.0143452	0.48179
DLI	Delhi	DLI	FC171013 FILE4	2.554	28.5	22		0.0430187	2.27438		FC171013 FILE4	0.0139402	28.5	22		-0.00167381	0.02482		FC171013 FILE4	0.0119801	28.5	22		-0.000466817	0.0150144		FC171013 FILE4	0.989628	28.5	22	-0.0409818	1.25601		FC171013 FILE4		0.560991	28.5	22	-0.0143452	0.654235
MFP	Muzaffarpur	MFP	FC13062014 1st insect	3.111	33.5	22		0.0430187	2.61628		FC13062014 1st insect	0.0169084	33.5	22		-0.00167381	0.0361571		FC13062014 1st insect	0.0151873	33.5	22		-0.000466817	0.0205556		FC13062014 1st insect	1.06895	33.5	22	-0.0409818	1.54024		FC13062014 1st insect		1.01336	33.5	22	-0.0143452	1.17833
DHB	Dhanbad	MFP	FC33062014 3rd insect	3.214	33.5	22		0.0430187	2.71928		FC33062014 3rd insect	0.0134064	33.5	22		-0.00167381	0.0326551		FC33062014 3rd insect	0.0101992	33.5	22		-0.000466817	0.0155676		FC33062014 3rd insect	0.509311	33.5	22	-0.0409818	0.980601		FC33062014 3rd insect		0.407299	33.5	22	-0.0143452	0.572269
		DLI	F_MAR16_JNU_6	2.247	20.4	22		0.0430187	2.31583		F_MAR16_JNU_6	0.0341036	20.4	22		-0.00167381	0.0314255		F_MAR16_JNU_6	0.0200199	20.4	22		-0.000466817	0.019273		F_MAR16_JNU_6	0.9634	20.4	22	-0.0409818	0.897829		F_MAR16_JNU_6		0.7586	20.4	22	-0.0143452	0.735648
		DLI	F_MAR17_DR_4	2.0528	18.7	22		0.0430187	2.19476		F_MAR17_DR_4	0.0380484	18.7	22		-0.00167381	0.0325248		F_MAR17_DR_4	0.0196075	18.7	22		-0.000466817	0.018067		F_MAR17_DR_4	0.846143	18.7	22	-0.0409818	0.710903		F_MAR17_DR_4		0.634875	18.7	22	-0.0143452	0.587536
		DLI	F_MAR17_DR_5	2.3996	18.5	22		0.0430187	2.55017		F_MAR17_DR_5	0.0562589	18.5	22		-0.00167381	0.0504006		F_MAR17_DR_5	0.0197946	18.5	22		-0.000466817	0.0181608		F_MAR17_DR_5	0.7085	18.5	22	-0.0409818	0.565064		F_MAR17_DR_5		0.442667	18.5	22	-0.0143452	0.392458
		DLI	F_MAR21_JNU_3	2.587	22.4	22		0.0430187	2.56979		F_MAR21_JNU_3	0.0149124	22.4	22		-0.00167381	0.0155819		F_MAR21_JNU_3	0.00669323	22.4	22		-0.000466817	0.00687995		F_MAR21_JNU_3	0.846375	22.4	22	-0.0409818	0.862768		F_MAR21_JNU_3		0.6345	22.4	22	-0.0143452	0.640238
		DLI	F_MAR21_JNU_6	2.552	22	22		0.0430187	2.552		F_MAR21_JNU_6	0.0228207	22	22		-0.00167381	0.0228207		F_MAR21_JNU_6	0.0160637	22	22		-0.000466817	0.0160637		F_MAR21_JNU_6	1.54726	22	22	-0.0409818	1.54726		F_MAR21_JNU_6		1.27435	22	22	-0.0143452	1.27435
		DLI	F_MAR24_JNU_5	2.639	24.5	22		0.0430187	2.53145		F_MAR24_JNU_5	0.0381587	24.5	22		-0.00167381	0.0423432		F_MAR24_JNU_5	0.0213016	24.5	22		-0.000466817	0.0224686		F_MAR24_JNU_5	0.846315	24.5	22	-0.0409818	0.94877		F_MAR24_JNU_5		0.634453	24.5	22	-0.0143452	0.670316
		DLI	F_MAR25_DR_6	2.569	24.2	22		0.0430187	2.47436		F_MAR25_DR_6	0.0293506	24.2	22		-0.00167381	0.033033		F_MAR25_DR_6	0.0169044	24.2	22		-0.000466817	0.0179314		F_MAR25_DR_6	0.481438	24.2	22	-0.0409818	0.571598		F_MAR25_DR_6		0.343025	24.2	22	-0.0143452	0.374584
		DLI	F_MAR25_DR_8	2.569	24.7	22		0.0430187	2.45285		F_MAR25_DR_8	0.0226574	24.7	22		-0.00167381	0.0271766		F_MAR25_DR_8	0.0159681	24.7	22		-0.000466817	0.0172285		F_MAR25_DR_8	1.81867	24.7	22	-0.0409818	1.92932		F_MAR25_DR_8		1.73587	24.7	22	-0.0143452	1.7746
		DLI	FILTERED8.3(10)	2.278	24.8	22		0.0430187	2.15755		FILTERED8.3(10)	0.028247	24.8	22		-0.00167381	0.0329337		FILTERED8.3(10)	0.0181633	24.8	22		-0.000466817	0.0194704		FILTERED8.3(10)	0.858837	24.8	22	-0.0409818	0.973586		FILTERED8.3(10)		0.703349	24.8	22	-0.0143452	0.743516
		DLI	FILTERED_MARCH7_JNU_2	2.387	19.8	22		0.0430187	2.48164		FILTERED_MARCH7_JNU_2	0.0229402	19.8	22		-0.00167381	0.0192579		FILTERED_MARCH7_JNU_2	0.0173147	19.8	22		-0.000466817	0.0162877		FILTERED_MARCH7_JNU_2	1.86998	19.8	22	-0.0409818	1.77982		FILTERED_MARCH7_JNU_2		1.76552	19.8	22	-0.0143452	1.73396
		DLI	FILTERED_MARCH7_JNU_4	2.435	18.9	22		0.0430187	2.56836		FILTERED_MARCH7_JNU_4	0.0273227	18.9	22		-0.00167381	0.0221339		FILTERED_MARCH7_JNU_4	0.0206414	18.9	22		-0.000466817	0.0191943		FILTERED_MARCH7_JNU_4	0.9368	18.9	22	-0.0409818	0.809757		FILTERED_MARCH7_JNU_4		0.814288	18.9	22	-0.0143452	0.769818
		DLI	FILTERED_MARCH_7JNU_1	2.395	20.2	22		0.0430187	2.47243		FILTERED_MARCH_7JNU_1	0.0234542	20.2	22		-0.00167381	0.0204413		FILTERED_MARCH_7JNU_1	0.016004	20.2	22		-0.000466817	0.0151637		FILTERED_MARCH_7JNU_1	0.509628	20.2	22	-0.0409818	0.435861		FILTERED_MARCH_7JNU_1		0.360132	20.2	22	-0.0143452	0.33431
		DDN	FC131026-71	2.158	22	22		0.0430187	2.158		FC131026-71	0.0307291	22	22		-0.00167381	0.0307291		FC131026-71	0.018259	22	22		-0.000466817	0.018259		FC131026-71	1.331	22	22	-0.0409818	1.331		FC131026-71		0.8958	22	22	-0.0143452	0.8958
		DDN	FC131026_0063NC	2.144	22	22		0.0430187	2.144		FC131026_0063NC	0.0299084	22	22		-0.00167381	0.0299084		FC131026_0063NC	0.0143944	22	22		-0.000466817	0.0143944		FC131026_0063NC	1.2356	22	22	-0.0409818	1.2356		FC131026_0063NC		1.0178	22	22	-0.0143452	1.0178
		DDN	FC131026_0065NC	2.035	22	22		0.0430187	2.035		FC131026_0065NC	0.0337968	22	22		-0.00167381	0.0337968		FC131026_0065NC	0.018251	22	22		-0.000466817	0.018251		FC131026_0065NC	1.0374	22	22	-0.0409818	1.0374		FC131026_0065NC		0.764	22	22	-0.0143452	0.764
		DDN	FC131026_0069NC	2.048	22	22		0.0430187	2.048		FC131026_0069NC	0.0258725	22	22		-0.00167381	0.0258725		FC131026_0069NC	0.0173825	22	22		-0.000466817	0.0173825		FC131026_0069NC	2.1788	22	22	-0.0409818	2.1788		FC131026_0069NC		0.8954	22	22	-0.0143452	0.8954
		DDN	FC131027_0084	2.229	22	22		0.0430187	2.229		FC131027_0084	0.0415817	22	22		-0.00167381	0.0415817		FC131027_0084	0.0174104	22	22		-0.000466817	0.0174104		FC131027_0084	1.1963	22	22	-0.0409818	1.1963		FC131027_0084		0.7068	22	22	-0.0143452	0.7068
		DDN	FC131028_0092	2.048	18	22		0.0430187	2.22007		FC131028_0092	0.0199395	18	22		-0.00167381	0.0132443		FC131028_0092	0.0195685	18	22		-0.000466817	0.0177013		FC131028_0092	1.4229	18	22	-0.0409818	1.25897		FC131028_0092		0.6605	18	22	-0.0143452	0.603119
		DDN	FC131028_0095NC	2.102	18	22		0.0430187	2.27407		FC131028_0095NC	0.0481474	18	22		-0.00167381	0.0414522		FC131028_0095NC	0.0171952	18	22		-0.000466817	0.015328		FC131028_0095NC	1.3893	18	22	-0.0409818	1.22537		FC131028_0095NC		0.5863	18	22	-0.0143452	0.528919
		DDN	FC131028_0097	2.021	18	22		0.0430187	2.19307		FC131028_0097	0.0550862	18	22		-0.00167381	0.048391		FC131028_0097	0.0205632	18	22		-0.000466817	0.018696		FC131028_0097	1.9318	18	22	-0.0409818	1.76787		FC131028_0097		0.8544	18	22	-0.0143452	0.797019
		DDN	FC131028_0099	1.956	17.5	22		0.0430187	2.14958		FC131028_0099	0.0379562	17.5	22		-0.00167381	0.0304241		FC131028_0099	0.0194064	17.5	22		-0.000466817	0.0173057		FC131028_0099	1.58086	17.5	22	-0.0409818	1.39644		FC131028_0099		1.08994	17.5	22	-0.0143452	1.02538
		DHB	fc131210_105	2.061	19	22		0.0430187	2.19006		fc131210_105	0.0369323	19	22		-0.00167381	0.0319109		fc131210_105	0.019239	19	22		-0.000466817	0.0178386		fc131210_105	1.4202	19	22	-0.0409818	1.29725		fc131210_105		1.2363	19	22	-0.0143452	1.19326
		DHB	fc131212_107	2.13	20	22		0.0430187	2.21604		fc131212_107	0.0443108	20	22		-0.00167381	0.0409631		fc131212_107	0.0185458	20	22		-0.000466817	0.0176122		fc131212_107	0.822444	20	22	-0.0409818	0.740481		fc131212_107		0.491111	20	22	-0.0143452	0.462421
		DHB	fc131213_114	2.061	21	22		0.0430187	2.10402		fc131213_114	0.0592877	21	22		-0.00167381	0.0576139		fc131213_114	0.0212694	21	22		-0.000466817	0.0208026		fc131213_114	1.425	21	22	-0.0409818	1.38402		fc131213_114		0.652875	21	22	-0.0143452	0.63853
		DDN	fc140830_0207	2.895	28	22		0.0430187	2.63689		fc140830_0207	0.0298526	28	22		-0.00167381	0.0398954		fc140830_0207	0.0129163	28	22		-0.000466817	0.0157172		fc140830_0207	0.751	28	22	-0.0409818	0.996891		fc140830_0207		0.3986	28	22	-0.0143452	0.484671
		DDN	fc140830_0209	2.784	28	22		0.0430187	2.52589		fc140830_0209	0.0201076	28	22		-0.00167381	0.0301504		fc140830_0209	0.0154143	28	22		-0.000466817	0.0182152		fc140830_0209	1.132	28	22	-0.0409818	1.37789		fc140830_0209		1.0354	28	22	-0.0143452	1.12147
		DDN	fc140830_0212	2.766	28	22		0.0430187	2.50789		fc140830_0212	0.0194422	28	22		-0.00167381	0.0294851		fc140830_0212	0.0147849	28	22		-0.000466817	0.0175858		fc140830_0212	0.8882	28	22	-0.0409818	1.13409		fc140830_0212		0.7671	28	22	-0.0143452	0.853171
		DDN	fc140830_0223	2.802	27.5	22		0.0430187	2.5654		fc140830_0223	0.0350876	27.5	22		-0.00167381	0.0442936		fc140830_0223	0.015498	27.5	22		-0.000466817	0.0180655		fc140830_0223	0.4097	27.5	22	-0.0409818	0.6351		fc140830_0223		0.1658	27.5	22	-0.0143452	0.244699
		DDN	FC 131026-60	2.158	22	22		0.0430187	2.158		FC 131026-60	0.0193386	22	22		-0.00167381	0.0193386		FC 131026-60	0.0160239	22	22		-0.000466817	0.0160239		FC 131026-60	0.717	22	22	-0.0409818	0.717		FC 131026-60		0.4754	22	22	-0.0143452	0.4754
		DLI	F_719	2.267	19.6	22		0.0430187	2.37024		F_719	0.0194064	19.6	22		-0.00167381	0.0153892		F_719	0.0139124	19.6	22		-0.000466817	0.012792		F_719	0.8733	19.6	22	-0.0409818	0.774944		F_719		0.7499	19.6	22	-0.0143452	0.715471
		DLI	F_723	2.274	19.9	22		0.0430187	2.36434		F_723	0.0391474	19.9	22		-0.00167381	0.0356324		F_723	0.0183147	19.9	22		-0.000466817	0.0173344		F_723	0.8736	19.9	22	-0.0409818	0.787538		F_723		0.6487	19.9	22	-0.0143452	0.618575
		DLI	F_729	2.309	25.2	22		0.0430187	2.17134		F_729	0.0399283	25.2	22		-0.00167381	0.0452845		F_729	0.0185418	25.2	22		-0.000466817	0.0200356		F_729	0.7197	25.2	22	-0.0409818	0.850842		F_729		0.3677	25.2	22	-0.0143452	0.413605
		DLI	F_740	2.28	26	22		0.0430187	2.10793		F_740	0.0334382	26	22		-0.00167381	0.0401335		F_740	0.0178367	26	22		-0.000466817	0.0197039		F_740	0.5704	26	22	-0.0409818	0.734327		F_740		0.457	26	22	-0.0143452	0.514381
		DLI	F_MAR13_JNU_1	2.355	23.6	22		0.0430187	2.28617		F_MAR13_JNU_1	0.0293068	23.6	22		-0.00167381	0.0319849		F_MAR13_JNU_1	0.0201753	23.6	22		-0.000466817	0.0209222		F_MAR13_JNU_1	1.8218	23.6	22	-0.0409818	1.88737		F_MAR13_JNU_1		1.7184	23.6	22	-0.0143452	1.74135
		DLI	F_MAR13_JNU_3	2.452	22	22		0.0430187	2.452		F_MAR13_JNU_3	0.0346698	22	22		-0.00167381	0.0346698		F_MAR13_JNU_3	0.0186415	22	22		-0.000466817	0.0186415		F_MAR13_JNU_3	0.7774	22	22	-0.0409818	0.7774		F_MAR13_JNU_3		0.5136	22	22	-0.0143452	0.5136
		DLI	F_MAR15_DR_3	2.088	18.7	22		0.0430187	2.22996		F_MAR15_DR_3	0.120805	18.7	22		-0.00167381	0.115281		F_MAR15_DR_3	0.0180916	18.7	22		-0.000466817	0.0165511		F_MAR15_DR_3	1.3476	18.7	22	-0.0409818	1.21236		F_MAR15_DR_3		0.5821	18.7	22	-0.0143452	0.534761
		DLI	F_MAR17_DR_2	2.06	20.5	22		0.0430187	2.12453		F_MAR17_DR_2	0.0388273	20.5	22		-0.00167381	0.0363166		F_MAR17_DR_2	0.0178636	20.5	22		-0.000466817	0.0171634		F_MAR17_DR_2	0.78175	20.5	22	-0.0409818	0.720277		F_MAR17_DR_2		0.5315	20.5	22	-0.0143452	0.509982
		DLI	F_MAR24_JNU_1	2.587	26.1	22		0.0430187	2.41062		F_MAR24_JNU_1	0.0502191	26.1	22		-0.00167381	0.0570817		F_MAR24_JNU_1	0.0148566	26.1	22		-0.000466817	0.0167705		F_MAR24_JNU_1	0.5916	26.1	22	-0.0409818	0.759625		F_MAR24_JNU_1		0.3868	26.1	22	-0.0143452	0.445615
		DLI	F_MAR25_DR_9	2.657	24.7	22		0.0430187	2.54085		F_MAR25_DR_9	0.0313028	24.7	22		-0.00167381	0.0358221		F_MAR25_DR_9	0.0139004	24.7	22		-0.000466817	0.0151608		F_MAR25_DR_9	0.9584	24.7	22	-0.0409818	1.06905		F_MAR25_DR_9		0.7412	24.7	22	-0.0143452	0.779932
		DLI	F_MAR25_DR_11	2.518	26.3	22		0.0430187	2.33302		F_MAR25_DR_11	0.0484422	26.3	22		-0.00167381	0.0556396		F_MAR25_DR_11	0.0182908	26.3	22		-0.000466817	0.0202981		F_MAR25_DR_11	0.7489	26.3	22	-0.0409818	0.925122		F_MAR25_DR_11		0.3388	26.3	22	-0.0143452	0.400484
		DLI	FC000101_0189	3.05	31	22		0.0430187	2.66283		FC000101_0189	0.0197092	31	22		-0.00167381	0.0347734		FC000101_0189	0.0145259	31	22		-0.000466817	0.0187272		FC000101_0189	0.4834	31	22	-0.0409818	0.852236		FC000101_0189		0.4133	31	22	-0.0143452	0.542407
		DLI	FILTERED8.3(11)	2.293	24.8	22		0.0430187	2.17255		FILTERED8.3(11)	0.0305418	24.8	22		-0.00167381	0.0352285		FILTERED8.3(11)	0.019008	24.8	22		-0.000466817	0.0203151		FILTERED8.3(11)	1.1738	24.8	22	-0.0409818	1.28855		FILTERED8.3(11)		0.9922	24.8	22	-0.0143452	1.03237
		DLI	FILTERED_MARCH7_JNU_3	2.452	19	22		0.0430187	2.58106		FILTERED_MARCH7_JNU_3	0.0325849	19	22		-0.00167381	0.0275635		FILTERED_MARCH7_JNU_3	0.0183208	19	22		-0.000466817	0.0169203		FILTERED_MARCH7_JNU_3	0.78075	19	22	-0.0409818	0.657805		FILTERED_MARCH7_JNU_3		0.533	19	22	-0.0143452	0.489964

## Sheet: Sheet 2
Linear regression sheet
	Recorded Temp(C)	PeakFre
	22	2.088
	22	2.172
	25.6	2.591
	24	2.659
	28.5	2.554
	33.5	3.111
	33.5	3.214
	20.4	2.247
	18.7	2.0528
	18.5	2.3996
	22.4	2.587
	22	2.552
	24.5	2.639
	24.2	2.569
	24.7	2.569
	24.8	2.278
	19.8	2.387
	18.9	2.435
	20.2	2.395
	22	2.158
	22	2.144		SUMMARY OUTPUT
	22	2.035
	22	2.048		Regression Statistics
	22	2.229		Multiple R	0.830623
	18	2.048		R Square	0.689934
	18	2.102		Adjusted R Square	0.683475
	18	2.021		Standard Error	0.172602
	17.5	1.956		Observations	50
	19	2.061
	20	2.13		ANOVA
	21	2.061			df	SS	MS	F	Significance F
	28	2.895		Regression	1	3.18189	3.18189	106.806	8.52537e-14
	28	2.784		Residual	48	1.42998	0.0297913
	28	2.766		Total	49	4.61187
	27.5	2.802
	22	2.158			Coefficients	Standard Error	t Stat	P-value	Lower 95%	Upper 95%	Lower 95.0%	Upper 95.0%
	19.6	2.267		Intercept	0.897191	0.146569	6.12127	1.63636e-07	0.602493	1.19189	0.602493	1.19189
	19.9	2.274		Recorded Temp(C)	0.0649051	0.00628031	10.3347	8.52537e-14	0.0522777	0.0775326	0.0522777	0.0775326
	25.2	2.309
	26	2.28
	23.6	2.355
	22	2.452
	18.7	2.088
	20.5	2.06
	26.1	2.587
	24.7	2.657
	26.3	2.518
	31	3.05
	24.8	2.293
	19	2.452

## Sheet: Table 1
Data on which the Kruskal Wallis ANOVA test of call parameters between host plant species and post hoc comparisons were performed.
Peak Frequency (PF), Syllable Period (SD), Syllable Duration (SD), Chirp Period (CP), and Chirp Duration (CD)
	Lantana							Hyptis						Adhatoda
PF	SP	SD	ED	EP		PF	SP	SD	ED	EP		PF	SP	SD	ED	EP
2.088	0.0229801	0.017745	0.607558	1.0149		2.035	0.0307291	0.018259	0.8958	1.331		2.37024	0.0153892	0.012792	0.715471	0.774944
2.172	0.044432	0.0231065	0.457098	1.02278		2.048	0.0299084	0.0143944	1.0178	1.2356		2.36434	0.0356324	0.0173344	0.618575	0.787538
2.43613	0.0291293	0.0163379	0.572908	0.793782		2.10402	0.0337968	0.018251	0.764	1.0374		2.17134	0.0452845	0.0200356	0.413605	0.850842
2.57296	0.0225707	0.0133002	0.48179	0.675408		2.144	0.0258725	0.0173825	0.8954	2.1788		2.10793	0.0401335	0.0197039	0.514381	0.734327
2.27438	0.02482	0.0150144	0.654235	1.25601		2.14958	0.0415817	0.0174104	0.7068	1.1963		2.28617	0.0319849	0.0209222	1.74135	1.88737
2.61628	0.0361571	0.0205556	1.17833	1.54024		2.158	0.0132443	0.0177013	0.603119	1.25897		2.452	0.0346698	0.0186415	0.5136	0.7774
2.71928	0.0326551	0.0155676	0.572269	0.980601		2.158	0.0414522	0.015328	0.528919	1.22537		2.22996	0.115281	0.0165511	0.534761	1.21236
2.31583	0.0314255	0.019273	0.735648	0.897829		2.19006	0.048391	0.018696	0.797019	1.76787		2.12453	0.0363166	0.0171634	0.509982	0.720277
2.1947	0.0325248	0.018067	0.587536	0.710903		2.19307	0.0304241	0.0173057	1.02538	1.39644		2.41062	0.0570817	0.0167705	0.445615	0.759625
2.55017	0.0504006	0.0181608	0.392458	0.565064		2.21604	0.0319109	0.0178386	1.19326	1.29725		2.54085	0.0358221	0.0151608	0.779932	1.06905
2.56979	0.0155819	0.00687995	0.640238	0.862768		2.22007	0.0409631	0.0176122	0.462421	0.740481		2.33302	0.0556396	0.0202981	0.400484	0.925122
2.552	0.0228207	0.0160637	1.27435	1.54726		2.229	0.0576139	0.0208026	0.63853	1.38402		2.66283	0.0347734	0.0187272	0.542407	0.852236
2.53145	0.0423432	0.0224686	0.670316	0.94877		2.27407	0.0398954	0.0157172	0.484671	0.996891		2.17255	0.0352285	0.0203151	1.03237	1.28855
2.47436	0.033033	0.0179314	0.374584	0.571598		2.50789	0.0301504	0.0182152	1.12147	1.37789		2.58106	0.0275635	0.0169203	0.489964	0.657805
2.45285	0.0271766	0.0172285	1.7746	1.92932		2.52589	0.0294851	0.0175858	0.853171	1.13409
2.15755	0.0329337	0.0194704	0.743516	0.973586		2.5654	0.0442936	0.0180655	0.244699	0.6351
2.48164	0.0192579	0.0162877	1.73396	1.77982		2.63689	0.0193386	0.0160239	0.4754	0.717
2.56836	0.0221339	0.0191943	0.769818	0.809757
2.47243	0.0204413	0.0151637	0.33431	0.435861

## Sheet: Figure_3
Data for the temporal and spectral parameters i.e., Peak Frequency (PF), Syllable Period (SD), Syllable Duration (SD), Echeme Period (EP), and Echeme Duration (ED) of the three plant species (Lantana camara, Hyptis suaveolens and Justicia adhatoda )
Lantana	Hyptis	Adhatoda		Lantana	Hyptis	Adhatoda		Lantana	Hyptis	Adhatoda		Lantana	Hyptis	Adhatoda			Lantana	Hyptis	Adhatoda
PF	PF	PF		SP	SP	SP		SD	SD	SD		ED	ED	ED			EP	EP	EP
2.088	2.035	2.37024		0.0229801	0.0307291	0.0153892		0.017745	0.018259	0.012792		0.607558	0.8958	0.715471			1.0149	1.331	0.774944
2.172	2.048	2.36434		0.044432	0.0299084	0.0356324		0.0231065	0.0143944	0.0173344		0.457098	1.0178	0.618575			1.02278	1.2356	0.787538
2.43613	2.10402	2.17134		0.0291293	0.0337968	0.0452845		0.0163379	0.018251	0.0200356		0.572908	0.764	0.413605			0.793782	1.0374	0.850842
2.57296	2.144	2.10793		0.0225707	0.0258725	0.0401335		0.0133002	0.0173825	0.0197039		0.48179	0.8954	0.514381			0.675408	2.1788	0.734327
2.27438	2.14958	2.28617		0.02482	0.0415817	0.0319849		0.0150144	0.0174104	0.0209222		0.654235	0.7068	1.74135			1.25601	1.1963	1.88737
2.61628	2.158	2.452		0.0361571	0.0132443	0.0346698		0.0205556	0.0177013	0.0186415		1.17833	0.603119	0.5136			1.54024	1.25897	0.7774
2.71928	2.158	2.22996		0.0326551	0.0414522	0.115281		0.0155676	0.015328	0.0165511		0.572269	0.528919	0.534761			0.980601	1.22537	1.21236
2.31583	2.19006	2.12453		0.0314255	0.048391	0.0363166		0.019273	0.018696	0.0171634		0.735648	0.797019	0.509982			0.897829	1.76787	0.720277
2.1947	2.19307	2.41062		0.0325248	0.0304241	0.0570817		0.018067	0.0173057	0.0167705		0.587536	1.02538	0.445615			0.710903	1.39644	0.759625
2.55017	2.21604	2.54085		0.0504006	0.0319109	0.0358221		0.0181608	0.0178386	0.0151608		0.392458	1.19326	0.779932			0.565064	1.29725	1.06905
2.56979	2.22007	2.33302		0.0155819	0.0409631	0.0556396		0.00687995	0.0176122	0.0202981		0.640238	0.462421	0.400484			0.862768	0.740481	0.925122
2.552	2.229	2.66283		0.0228207	0.0576139	0.0347734		0.0160637	0.0208026	0.0187272		1.27435	0.63853	0.542407			1.54726	1.38402	0.852236
2.53145	2.27407	2.17255		0.0423432	0.0398954	0.0352285		0.0224686	0.0157172	0.0203151		0.670316	0.484671	1.03237			0.94877	0.996891	1.28855
2.47436	2.50789	2.58106		0.033033	0.0301504	0.0275635		0.0179314	0.0182152	0.0169203		0.374584	1.12147	0.489964			0.571598	1.37789	0.657805
2.45285	2.52589			0.0271766	0.0294851			0.0172285	0.0175858			1.7746	0.853171				1.92932	1.13409
2.15755	2.5654			0.0329337	0.0442936			0.0194704	0.0180655			0.743516	0.244699				0.973586	0.6351
2.48164	2.63689			0.0192579	0.0193386			0.0162877	0.0160239			1.73396	0.4754				1.77982	0.717
2.56836				0.0221339				0.0191943				0.769818					0.809757
2.47243				0.0204413				0.0151637				0.33431					0.435861

## Sheet: Figure_4
Data for the calling site's proportions of O. indicus on native and non-native plants
s	Insect Species	Calling site		Plant Species	Insect Species	Calling site		Plant Species	Insect Species	Calling site
Hyptis Suaveolens	O. Indicus	LEAF MARGIN		Justicia adhatoda	O. Indicus	TOP OF LEAF		Lantana camara	O. Indicus	BETWEEN 2 LEAVES
Hyptis Suaveolens	O. Indicus	LEAF MARGIN		Justicia adhatoda	O. Indicus	BETWEEN 2 LEAVES		Lantana camara	O. Indicus	LEAF MARGIN
Hyptis Suaveolens	O. Indicus	BAFFLING		Justicia adhatoda	O. Indicus	LEAF MARGIN		Lantana camara	O. Indicus	BETWEEN 2 LEAVES
Hyptis Suaveolens	O. Indicus	TOP OF LEAF		Justicia adhatoda	O. Indicus	LEAF MARGIN		Lantana camara	O. Indicus	TOP OF LEAF
Hyptis Suaveolens	O. Indicus	TOP OF LEAF		Justicia adhatoda	O. Indicus	LEAF MARGIN		Lantana camara	O. Indicus	LEAF MARGIN
Hyptis Suaveolens	O. Indicus	TOP OF LEAF		Justicia adhatoda	O. Indicus	BAFFLING		Lantana camara	O. Indicus	LEAF MARGIN
Hyptis Suaveolens	O. Indicus	BAFFLING		Justicia adhatoda	O. Indicus	LEAF MARGIN		Lantana camara	O. Indicus	LEAF MARGIN
Hyptis Suaveolens	O. Indicus	TOP OF LEAF		Justicia adhatoda	O. Indicus	LEAF MARGIN		Lantana camara	O. Indicus	LEAF MARGIN
Hyptis Suaveolens	O. Indicus	BAFFLING		Justicia adhatoda	O. Indicus	LEAF MARGIN		Lantana camara	O. Indicus	BETWEEN 2 LEAVES
Hyptis Suaveolens	O. Indicus	LEAF MARGIN		Justicia adhatoda	O. Indicus	LEAF MARGIN		Lantana camara	O. Indicus	LEAF MARGIN
Hyptis Suaveolens	O. Indicus	TOP OF LEAF		Justicia adhatoda	O. Indicus	BETWEEN 2 LEAVES		Lantana camara	O. Indicus	LEAF MARGIN
Hyptis Suaveolens	O. Indicus	TOP OF LEAF		Justicia adhatoda	O. Indicus	BAFFLING		Lantana camara	O. Indicus	TOP OF LEAF
Hyptis Suaveolens	O. Indicus	TOP OF LEAF		Justicia adhatoda	O. Indicus	BAFFLING		Lantana camara	O. Indicus	LEAF MARGIN
Hyptis Suaveolens	O. Indicus	TOP OF LEAF		Justicia adhatoda	O. Indicus	LEAF MARGIN		Lantana camara	O. Indicus	LEAF MARGIN
Hyptis Suaveolens	O. Indicus	BAFFLING		Justicia adhatoda	O. Indicus	LEAF MARGIN		Lantana camara	O. Indicus	BETWEEN 2 LEAVES
Hyptis Suaveolens	O. Indicus	BAFFLING						Lantana camara	O. Indicus	LEAF MARGIN
Hyptis Suaveolens	O. Indicus	BAFFLING						Lantana camara	O. Indicus	TOP OF LEAF
Hyptis Suaveolens	O. Indicus	BAFFLING						Lantana camara	O. Indicus	LEAF MARGIN
Hyptis Suaveolens	O. Indicus	LEAF MARGIN						Lantana camara	O. Indicus	TOP OF LEAF
								Lantana camara	O. Indicus	LEAF MARGIN
		LEAF MARGIN	BAFFLING	TOP OF LEAF	BETWEEN 2 LEAVES	TOTAL
	Hyptis	4	7	8	0	19
	Proportion (%)	21.0526	36.8421	42.1053		100
	Lantana	12	0	4	4	20
	Proportion (%)	60		20	20	100
	Adhatoda	9	3	1	2	15
	Proportion (%)	60	20	6.66667	13.3333	100
